# Supplementary material for: Association of Open vs Robot-Assisted Radical Cystectomy With Mortality and Perioperative Outcomes Among Patients With Bladder Cancer in Sweden
Source: PubMed Central journal article supplement (PMC9051984; doi:10.1001/jamanetworkopen.2022.8959), 2022-04-28
Supplement: jamanetwopen-e228959-s001.pdf [file jamanetwopen-e228959-s001.pdf]

## Supplemental Online Content

Mortezavi A, Crippa A, Kotopouli MI, Akre O, Wiklund P, Hosseini A. Association of open vs robot-assisted radical cystectomy with mortality and perioperative outcomes among patients with bladder cancer in Sweden. *JAMA Netw Open*. 2022;5(4):e228959. doi:10.1001/jamanetworkopen.2022.8959

**eFigure 1.** Survival Analysis Before Propensity Score Matching

**eTable 1.** Univariate Cox Regression Model Before Propensity Score Matching

**eFigure 2.** Propensity Score Distributions Before and After Propensity Score Matching

**eTable 2.** Univariable Cox Regression Analysis and E-Values for Mortality Analysis After Propensity Score Matching

**eTable 3.** Sensitivity Analysis for Year of Surgery, Baseline Characteristic, Outcomes, Univariable Cox Regression Analysis for All-Cause Mortality

**eFigure 3.** Sensitivity Survival Analysis for Year of Surgery

This supplemental material has been provided by the authors to give readers additional information about their work.

**eFigure 1. Survival Analysis Before Propensity Score Matching**

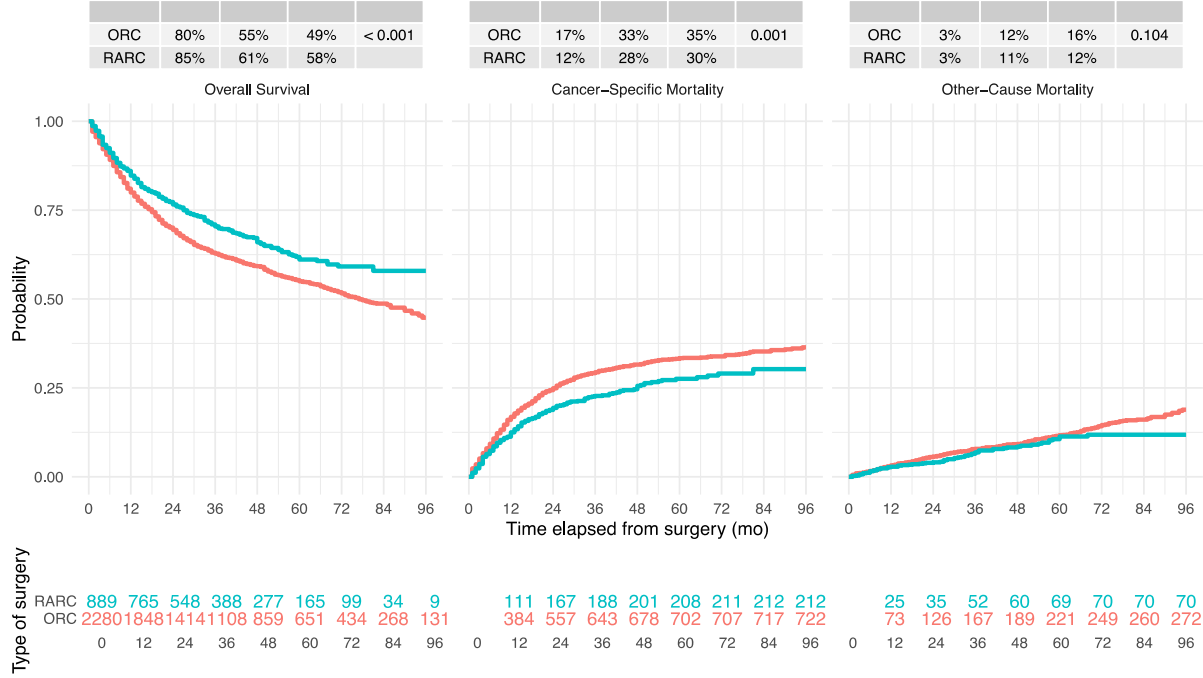

Cumulative incidence functions illustrating cancer-specific (CSM), other-cause mortality (OCM), and overall survival (OS, 1 – all-cause mortality) for patients undergoing open radical cystectomy (ORC) and robot-assisted radical cystectomy (RARC). Tables include the number of events for CSM and OCM, numbers at risk for OS, and estimates for 1, 5 and 7 years. P-value using the Gray’s and log-rank tests.

**eTable 1. Univariate Cox Regression Model Before Propensity Score Matching**

|                        | Characteristics                             | All-cause mortality |           |                  |
|------------------------|---------------------------------------------|---------------------|-----------|------------------|
|                        |                                             | HR                  | 95% CI    | p*               |
| Female gender          | female vs. male                             | 1.05                | 0.93-1.19 | 0.43             |
| Age                    | years, continuous (interval 5)              | 1.17                | 1.13-1.21 | <b>&lt;0.001</b> |
| BMI                    | kg/m <sup>2</sup> , continuous (interval 5) | 0.84                | 0.79-0.90 | <b>&lt;0.001</b> |
| ASA score              | III/IV vs. I/II                             | 1.62                | 1.44-1.81 | <b>&lt;0.001</b> |
| Prior surgery / RTx    | yes vs. no                                  | 1.12                | 0.98-1.28 | 0.12             |
| Clinical T stage       | cT2 vs. Ta/T1/Tis                           | 1.77                | 1.52-2.05 | <b>&lt;0.001</b> |
|                        | cT3 vs. Ta/T1/Tis                           | 2.41                | 2.00-2.90 | <b>&lt;0.001</b> |
|                        | cT4 vs. Ta/T1/Tis                           | 3.15                | 2.50-3.97 | <b>&lt;0.001</b> |
| Clinical N stage       | cN+ vs. cN-                                 | 1.76                | 1.49-2.08 | <b>&lt;0.001</b> |
| NAC                    | yes vs. no                                  | 0.77                | 0.68-0.87 | <b>&lt;0.001</b> |
| Annual hospital volume | 11-25 vs. 1-10                              | 0.82                | 0.68-0.99 | <b>0.04</b>      |
|                        | >25 vs. 1-10                                | 0.79                | 0.67-0.93 | <b>0.006</b>     |
| Pathological stage     | pT2 vs. pT0/pTa/T1/Tis                      | 1.99                | 1.66-2.38 | <b>&lt;0.001</b> |
|                        | pT3 vs. pT0/pTa/T1/Tis                      | 4.13                | 3.56-4.79 | <b>&lt;0.001</b> |
|                        | pT4 vs. pT0/pTa/T1/Tis                      | 7.6                 | 6.43-8.98 | <b>&lt;0.001</b> |

BMI: body mass index, ASA: American Society of Anesthesiologists, RTx: radio therapy, NAC: neoadjuvant chemotherapy, HR: hazard ratio, CI: confidence interval. \* Bold face representing P < 0.05.

**eFigure 2.** Propensity Score Distributions Before and After Propensity Score Matching

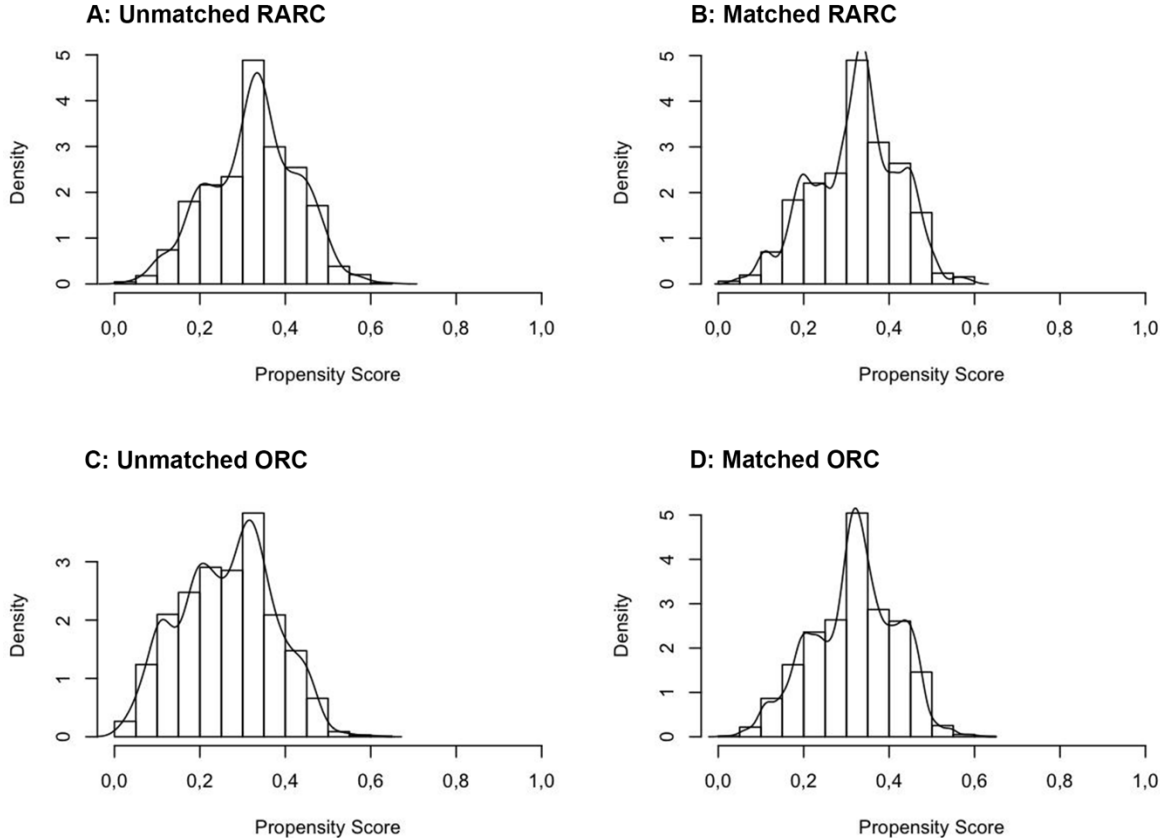

The propensity score distributions for the groups both before and after matching; Figure 1A and C demonstrate an initial dissimilarity on the basis of propensity score distributions. After matching, the distributions of the propensity scores (Figure 1 B and D) were homogeneous and confirmed the adequacy of the propensity score model to achieve balance. RARC: robot-assisted radical cystectomy, ORC: open radical cystectomy

**eTable 2.** Univariable Cox Regression Analysis and E-Values for Mortality Analysis After Propensity Score Matching

| eTable 2 (A). Univariable Cox regression analysis for all-cause, cancer-specific, and other-cause mortality (after matching) |                          |                     |               |                  |                     |               |                  |                           |           |                  |                       |               |                  |
|------------------------------------------------------------------------------------------------------------------------------|--------------------------|---------------------|---------------|------------------|---------------------|---------------|------------------|---------------------------|-----------|------------------|-----------------------|---------------|------------------|
| Variable                                                                                                                     | Characteristics          | Before PSM          |               |                  | After PSM           |               |                  |                           |           |                  |                       |               |                  |
|                                                                                                                              |                          | All-cause mortality |               |                  | All-cause mortality |               |                  | Cancer-specific mortality |           |                  | Other-cause mortality |               |                  |
|                                                                                                                              |                          | HR                  | 95% CI        | p*               | HR                  | 95% CI        | p*               | HR                        | 95% CI    | p*               | HR                    | 95% CI        | p*               |
| Estimated blood loss                                                                                                         | continuous, ml (per 250) | 1.0<br>4            | 1.02-<br>1.05 | <b>&lt;0.001</b> | 1.0<br>3            | 1.01-<br>1.04 | <b>0.001</b>     | 1.0<br>2                  | 1.00-1.04 | <b>0.015</b>     | 1.0<br>3              | 1.01-<br>1.06 | <b>0.012</b>     |
| Blood transfusion                                                                                                            | yes vs. no               | 1.6<br>3            | 1.44-<br>1.85 | <b>&lt;0.001</b> | 1.6<br>9            | 1.45-<br>1.97 | <b>&lt;0.001</b> | 1.7<br>1                  | 1.42-2.05 | <b>&lt;0.001</b> | 1.6<br>4              | 1.25-<br>2.16 | <b>&lt;0.001</b> |
| No. of removed LN*                                                                                                           | continuous (interval 5)  | 0.9<br>2            | 0.90-<br>0.95 | <b>&lt;0.001</b> | 0.9<br>0            | 0.86-<br>0.94 | <b>&lt;0.001</b> | 0.9<br>1                  | 0.86-0.95 | <b>&lt;0.001</b> | 0.8<br>8              | 0.82-<br>0.95 | <b>&lt;0.001</b> |
| Nodal status                                                                                                                 | N+ vs. N-                | 3.1<br>1            | 2.77-<br>3.50 | <b>&lt;0.001</b> | 3.2<br>8            | 2.85-<br>3.78 | <b>&lt;0.001</b> | 3.9<br>7                  | 3.39-4.66 | <b>&lt;0.001</b> | 1.7<br>9              | 1.33-<br>2.42 | <b>&lt;0.001</b> |
| Complications                                                                                                                | CD I-II vs. none         | 1.0<br>0            | 0.87-<br>1.14 | 0.97             | 1.0<br>3            | 0.88-<br>1.22 | 0.69             | 1.0<br>9                  | 0.90-1.31 | 0.383            | 0.8<br>9              | 0.65-<br>1.22 | 0.460            |
|                                                                                                                              | CD III vs. none          | 1.2<br>1            | 1.04-<br>1.41 | <b>0.013</b>     | 1.2<br>6            | 1.04-<br>1.51 | <b>0.016</b>     | 1.2<br>0                  | 0.96-1.50 | 0.105            | 1.3<br>9              | 1.01-<br>1.91 | <b>0.041</b>     |
|                                                                                                                              | CD IV vs. none           | 1.8<br>8            | 1.43-<br>2.47 | <b>&lt;0.001</b> | 1.7<br>1            | 1.18-<br>2.50 | <b>0.005</b>     | 1.2<br>8                  | 0.78-2.12 | 0.329            | 2.7<br>6              | 1.54-<br>4.95 | <b>0.001</b>     |
| Type of surgery                                                                                                              | RARC vs. ORC             | 0.8<br>1            | 0.70-<br>0.93 | <b>0.003</b>     | 0.7<br>1            | 0.56-<br>0.89 | <b>0.004</b>     | 0.7<br>7                  | 0.58-1.01 | 0.057            | 0.5<br>7              | 0.37-<br>0.89 | <b>0.013</b>     |

PSM: propensity score matching, LN: lymph nodes, CD: Clavien-Dindo, RARC: robot-assisted radical cystectomy, ORC: open radical cystectomy, HR: hazard ratio, CI: confidence interval. Bold face representing P < 0.05. \* in patients undergoing pelvic lymph node dissection

| <b>eTable 2 (B). E-Values for all-cause, cancer-specific, and other-cause mortality (in the matched cohort)</b> |                          |                            |               |                                  |               |                              |               |
|-----------------------------------------------------------------------------------------------------------------|--------------------------|----------------------------|---------------|----------------------------------|---------------|------------------------------|---------------|
| <b>Variable</b>                                                                                                 | <b>Characteristics</b>   | <b>All-cause mortality</b> |               | <b>Cancer-specific mortality</b> |               | <b>Other-cause mortality</b> |               |
|                                                                                                                 |                          | <b>E-value</b>             | <b>95% CI</b> | <b>E-value</b>                   | <b>95% CI</b> | <b>E-value</b>               | <b>95% CI</b> |
| Estimated blood loss                                                                                            | continuous, ml (per 250) | 1.21                       | 1.11-NA       | 1.16                             | 1.00-NA       | 1.21                         | 1.11-NA       |
| Blood transfusion                                                                                               | yes vs. no               | 2.77                       | 2.26-NA       | 2.81                             | 2.19-NA       | 2.66                         | 1.81-NA       |
| No. of removed LN*                                                                                              | continuous (interval 5)  | 1.46                       | NA-1.32       | 1.43                             | NA-1.29       | 1.53                         | NA-1.29       |
| Nodal status                                                                                                    | N+ vs. N-                | 6.01                       | 5.15-NA       | 7.40                             | 6.24-NA       | 2.98                         | 1.99-NA       |
| Complications                                                                                                   | CD I-II vs. none         | 1.21                       | 1.00-NA       | 1.40                             | 1.00-NA       | 1.50                         | NA-1.00       |
|                                                                                                                 | CD III vs. none          | 1.83                       | 1.24-NA       | 1.69                             | 1.00-NA       | 2.13                         | 1.11-NA       |
|                                                                                                                 | CD IV vs. none           | 2.81                       | 1.64-NA       | 1.88                             | 1.00-NA       | 4.96                         | 2.45-NA       |
| Type of surgery                                                                                                 | RARC vs. ORC             | 2.17                       | NA-1.50       | 1.92                             | NA-1.00       | 2.90                         | NA-1.50       |

*LN: lymph nodes, CD: Clavien-Dindo, RARC: robot-assisted radical cystectomy, ORC: open radical cystectomy, CI: confidence interval. \* in patients undergoing pelvic lymph node dissection. NA: not applicable*

**eTable 3.** Sensitivity Analysis for Year of Surgery, Baseline Characteristic, Outcomes, Univariable Cox Regression Analysis for All-Cause Mortality

| eTable 3 (A): Sensitivity analysis for year of surgery, baseline characteristics |                            |              |       |                           |              |        |
|----------------------------------------------------------------------------------|----------------------------|--------------|-------|---------------------------|--------------|--------|
|                                                                                  | Before propensity matching |              |       | After propensity matching |              |        |
|                                                                                  | ORC (n=2280)               | RARC (n=889) | SMD*  | ORC (n=1457)              | RARC (n=879) | SMD*   |
| Female gender, n (%)                                                             | 567 (24.9)                 | 216 (24.3)   | -0.01 | 339 (23.3)                | 213 (24.2)   | -0.02  |
| Age (y)                                                                          | 71 (66, 76)                | 71 (65, 76)  | -0.07 | 71 (65, 76)               | 71 (65, 76)  | -0.01  |
| BMI (kg/m <sup>2</sup> )                                                         | 26 (23, 28)                | 26 (23, 28)  | 0.21  | 26 (23, 28)               | 26 (23, 28)  | -0.01  |
| Missing                                                                          | 27 (1.2)                   | 1 (0.1)      |       | 4 (0.3)                   | 1 (0.1)      |        |
| ASA score, n (%)                                                                 |                            |              |       |                           |              |        |
| I                                                                                | 271 (12.0)                 | 101 (11.5)   | -0.02 | 170 (11.8)                | 100 (11.5)   | -0.02  |
| II                                                                               | 1327 (58.9)                | 433 (49.1)   | -0.19 | 778 (53.8)                | 433 (49.7)   | -0.01  |
| III                                                                              | 635 (28.2)                 | 332 (37.6)   | 0.2   | 479 (33.1)                | 326 (37.4)   | 0.02   |
| IV                                                                               | 20 (0.9)                   | 16 (1.8)     | 0.07  | 18 (1.2)                  | 13 (1.5)     | 0.001  |
| Missing                                                                          | 27 (1.2)                   | 7 (0.8)      |       | 12 (0.8)                  | 7 (0.8)      |        |
| Prior surgery / RTx, n (%)                                                       | 429 (19.3)                 | 157 (17.8)   | -0.03 | 278 (19.3)                | 154 (17.6)   | -0.01  |
| Missing                                                                          | 56 (2.5)                   | 6 (0.7)      |       | 13 (0.9)                  | 6 (0.7)      |        |
| Clinical T stage, n (%)                                                          |                            |              |       |                           |              |        |
| Tis/Ta/T1                                                                        | 591 (25.9)                 | 244 (27.4)   | 0.03  | 413 (28.3)                | 241 (27.4)   | -0.02  |
| T2                                                                               | 1185 (52.0)                | 512 (57.6)   | 0.11  | 788 (54.1)                | 505 (57.5)   | 0.03   |
| T3                                                                               | 336 (14.7)                 | 86 (9.7)     | -0.17 | 166 (11.4)                | 86 (9.8)     | -0.01  |
| T4                                                                               | 135 (5.9)                  | 40 (4.5)     | -0.07 | 76 (5.2)                  | 40 (4.6)     | -0.01  |
| cTx                                                                              | 33 (1.4)                   | 7 (0.8)      |       | 14 (1.0)                  | 7 (0.8)      |        |
| Clinical N stage, n (%)                                                          |                            |              |       |                           |              |        |
| cN+                                                                              | 226 (9.9)                  | 62 (7.0)     | -0.12 | 121 (8.3)                 | 62 (7.1)     | -0.02  |
| NAC, n (%)                                                                       | 745 (32.9)                 | 303 (34.2)   | 0.03  | 493 (33.9)                | 300 (34.2)   | -0.02  |
| Missing                                                                          | 17 (0.7)                   | 3 (0.3)      |       | 4 (0.3)                   | 3 (0.3)      |        |
| Annual hospital vol., n (%)                                                      |                            |              |       |                           |              |        |
| 1 - 10                                                                           | 287 (12.6)                 | 35 (3.9)     | -0.45 | 58 (4.0)                  | 35 (4.0)     | -0.01  |
| 11 - 25                                                                          | 564 (24.7)                 | 144 (16.2)   | -0.23 | 286 (19.6)                | 144 (16.4)   | -0.01  |
| >25                                                                              | 1429 (62.7)                | 710 (79.9)   | 0.43  | 1113 (76.4)               | 700 (79.6)   | -0.007 |
| Year of surgery                                                                  |                            |              |       |                           |              |        |
| 2011-2013                                                                        | 865 (37.9)                 | 173 (19.5)   | -0.47 | 360 (24.7)                | 173 (19.7)   | -0.01  |
| 2014-2015                                                                        | 597 (26.2)                 | 255 (28.7)   | 0.06  | 422 (29.0)                | 251 (28.6)   | 0.02   |
| 2016-2018                                                                        | 818 (35.9)                 | 461 (51.9)   | 0.32  | 675 (46.3)                | 455 (51.8)   | -0.003 |

Data presented as median (quartile 1, quartile 3) or frequency (percentage). ORC: open radical cystectomy, RARC: robot-assisted radical cystectomy, SMD: standardized mean difference, y: year, BMI: body mass index, ASA: American Society of Anesthesiologists, RTx: radio therapy, NAC: neoadjuvant chemotherapy, vol.: volume.

| eTable 3 (B): Sensitivity analysis for year of surgery, outcome parameters |                 |                |        | SMD         |            |
|----------------------------------------------------------------------------|-----------------|----------------|--------|-------------|------------|
|                                                                            | ORC (n=1457)    | RARC (n=879)   | p      | before PSM* | after PSM* |
| <b>INTRAOPERATIVE PARAMETERS</b>                                           |                 |                |        |             |            |
| Urethrectomy, n (%)                                                        | 290 (20.0)      | 170 (19.5)     | 0.8    |             |            |
| Missing                                                                    | 7 (0.5)         | 5 (0.6)        |        |             |            |
| Deviation type, n (%)                                                      |                 |                |        |             |            |
| Ileum conduit                                                              | 1299 (89.2)     | 694 (79.0)     | <0.001 |             |            |
| OBS                                                                        | 103 (7.1)       | 180 (20.5)     |        |             |            |
| CCUD                                                                       | 20 (1.4)        | 1 (0.1)        |        |             |            |
| Other                                                                      | 34 (2.3)        | 4 (0.5)        |        |             |            |
| Missing                                                                    | 1 (0.1)         | 0 (0.0)        |        |             |            |
| Estimated blood loss (ml)                                                  | 700 (400, 1200) | 150 (100, 300) | <0.001 |             |            |
| Missing                                                                    | 21 (1.4)        | 22 (2.5)       |        |             |            |
| Intra-OP blood transfusion, n (%)                                          | 512 (37.2)      | 63 (7.7)       | <0.001 |             |            |
| Missing                                                                    | 82 (5.6)        | 59 (6.7)       |        |             |            |
| Peri-OP blood transfusion**, n (%)                                         | 478 (50.7)      | 144 (20.7)     | <0.001 |             |            |
| Missing                                                                    | 155 (14.1)      | 12 (1.7)       |        |             |            |
| Operation time (min)                                                       | 320 (244, 420)  | 320 (260, 380) | 0.5    |             |            |
| Missing                                                                    | 24 (1.6)        | 29 (3.3)       |        |             |            |
| <b>POSTOPERATIVE PARAMETERS</b>                                            |                 |                |        |             |            |
| Clavien-Dindo classification, n (%)                                        |                 |                |        |             |            |
| I-II                                                                       | 374 (26.4)      | 283 (32.7)     | 0.001  |             |            |
| III                                                                        | 264 (18.6)      | 123 (14.2)     |        |             |            |
| IV                                                                         | 50 (3.5)        | 19 (2.2)       |        |             |            |
| V                                                                          | 21 (1.5)        | 7 (0.8)        |        |             |            |
| Missing                                                                    | 41 (2.8)        | 14 (1.6)       |        |             |            |
| Re-operation, n (%)                                                        | 177 (12.4)      | 82 (9.4)       | 0.03   |             |            |
| Missing                                                                    | 33 (2.3)        | 11 (1.3)       |        |             |            |
| Lengths of stay (days)                                                     | 13 (10, 17)     | 9 (6, 13)      | <0.001 |             |            |
| Missing                                                                    | 37 (2.5)        | 10 (1.1)       |        |             |            |
| Re-hospitalization in 90d, n (%)                                           | 377 (26.8)      | 291 (33.8)     | <0.001 |             |            |
| Missing                                                                    | 50 (3.4)        | 17 (1.9)       |        |             |            |
| Pathological T-stage, n (%)                                                |                 |                |        |             |            |
| T0                                                                         | 335 (23.0)      | 200 (22.8)     | 0.9    | 0.05        | -0.01      |
| Tis/Ta/T1                                                                  | 321 (22.0)      | 201 (22.9)     |        | 0.04        | 0.01       |
| T2                                                                         | 260 (17.8)      | 161 (18.3)     |        | 0.02        | 0.003      |
| T3                                                                         | 377 (25.9)      | 230 (26.2)     |        | -0.02       | 0.01       |
| T4                                                                         | 153 (10.5)      | 80 (9.1)       |        | -0.14       | -0.03      |
| pTx                                                                        | 11 (0.8)        | 7 (0.8)        |        |             |            |
| Removed lymph nodes, n (%)***                                              | 14 (8, 25)      | 20 (15, 27)    | <0.001 |             |            |
| Missing                                                                    | 85 (6.6)        | 23 (2.8)       |        |             |            |
| N+, n (%)                                                                  | 279 (19.7)      | 171 (20.6)     | 0.6    |             |            |
| Missing                                                                    | 42 (2.9)        | 48 (5.5)       |        |             |            |

Data presented as median (quartile 1, quartile 3) or frequency (percentage). ORC: open radical cystectomy, RARC: robot-assisted radical cystectomy, SMD: standardized mean difference, PLND: pelvic lymph node dissection, OBS: orthotopic bladder substitution, CCUD:



continent cutaneous urinary diversion, LN: lymph node. \*Reported for variables used in propensity score matching, \*\* Total no of patients receiving transfusions during hospitalisation (including intra-OP transfusions). Variable reported since 2014 (denominator post matching ORC n=1097 and RARC n=706), \*\*\*in patients undergoing PLND.

RARC was associated with a lower high-grade complication (CD  $\geq$ III) rate compared with ORC (17.2% vs. 23.6%, OR=0.67, 95% CI: 0.54-0.83; p<0.001).

| eTable 3 (C): Sensitivity analysis for year of surgery, univariable Cox regression analysis for all-cause mortality |                          |                     |           |        |
|---------------------------------------------------------------------------------------------------------------------|--------------------------|---------------------|-----------|--------|
| Variable                                                                                                            | Characteristics          | All-cause mortality |           |        |
|                                                                                                                     |                          | HR                  | 95% CI    | p*     |
| Estimated blood loss                                                                                                | continuous, ml (per 250) | 1.03                | 1.02-1.05 | <0.001 |
| Blood transfusion                                                                                                   | yes vs. no               | 1.76                | 1.53-2.03 | <0.001 |
| No. of removed LN*                                                                                                  | continuous (interval 5)  | 0.90                | 0.88-0.93 | <0.001 |
| Nodal status                                                                                                        | N+ vs. N-                | 3.34                | 2.90-3.85 | <0.001 |
| Complications                                                                                                       | CD I-II vs. none         | 1.00                | 0.84-1.18 | 0.983  |
|                                                                                                                     | CD III vs. none          | 1.22                | 1.00-1.47 | 0.044  |
|                                                                                                                     | CD IV vs. none           | 2.24                | 1.62-3.11 | <0.001 |
| Type of surgery                                                                                                     | RARC vs. ORC             | 0.83                | 0.72-0.96 | 0.011  |

*LN: lymph nodes, CD: Clavien-Dindo, RARC: robot-assisted radical cystectomy, ORC: open radical cystectomy, HR: hazard ratio, CI: confidence interval. Bold face representing P < 0.05. \* in patients undergoing pelvic lymph node dissection*

**eFigure 3. Sensitivity Survival Analysis for Year of Surgery**

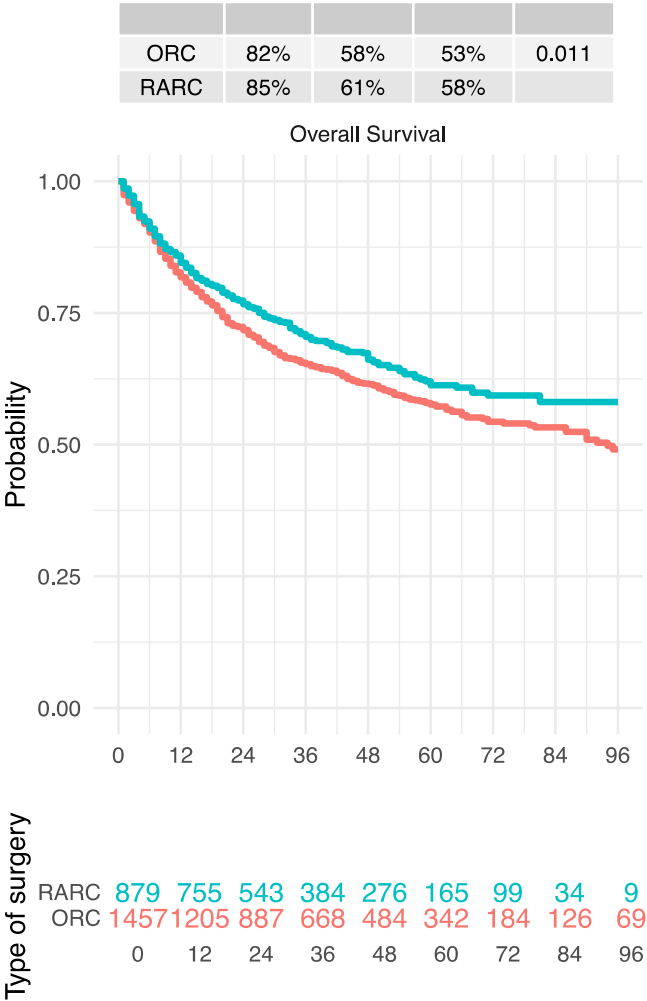

Cumulative incidence functions illustrating overall survival (OS) for patients undergoing open radical cystectomy (ORC) and robot-assisted radical cystectomy (RARC). Tables include the numbers at risk for OS, and estimates for 1, 5 and 7 years. P-value using log-rank tests.

Due to a slightly higher rate of pT4 tumors in the ORC group (10.5% vs. 9.1%) after propensity score matching including the year of surgery, we performed a subgroup analysis and excluded all patients with pT4 tumor. The difference in OS remained statistically significant with a benefit for RARC (p=0.015)
